# Supplementary material for: Synthesis, structure and hydrogen adsorption of a novel porous metal–organic framework, Mn9(btt)2(HCOO)12·0.7DMF·0.9H2O, where btt = 1,3,5-benzenetristetrazolate
Source: Royal Society of Chemistry journal article supplement (doi:10.1039/b925769a), 2010-01-01
Supplement: b925769a.pdf [file b925769a.pdf]

**Synthesis, structure and hydrogen adsorption of a novel porous metal-organic framework,  $\text{Mn}_9(\text{btt})_2(\text{HCOO})_{12}\cdot 0.7\text{DMF}\cdot 0.9\text{H}_2\text{O}$ , where **btt = 1,3,5-benzenetristetrazolate****

Ju-Hsiou Liao<sup>\*,†</sup>, Wan-Ting Chen,<sup>†</sup> Cherng-Shiaw Tsai,<sup>†</sup>  
Ching-Chun Yang,<sup>‡</sup> Chih-Chieh Wang<sup>‡</sup>

*Department of Chemistry and Biochemistry, National Chung Cheng University  
168 University Rd., Min-Hsiung, Chia-Yi, Taiwan, and Department Chemistry, Soochow  
University, 70 Linhsi Road, Shihlin, Taipei, Taiwan*

**Supporting Information**

**Contents**

- Figure S1. (a) Simulated X-ray powder diffraction pattern (in blue) of **1**, based on single-crystal data. (b) Experimental XRPD of the as-synthesized product (in red).
- Figure S2. (a) Experimental X-ray powder diffraction pattern (in green) of **1** annealed at 120°C. (b) Experimental XRPD of the as-synthesized product (in red).
- Figure S3. Thermogravimetric analysis of **1**.
- Figure S4. Solid-state photoluminescence spectrum of  $\text{H}_3\text{btt}\cdot 2\text{HCl}$  with  $\lambda_{\text{ex}} = 300$  nm.
- Figure S5. Infrared spectrum of **1**.

Figure 1S

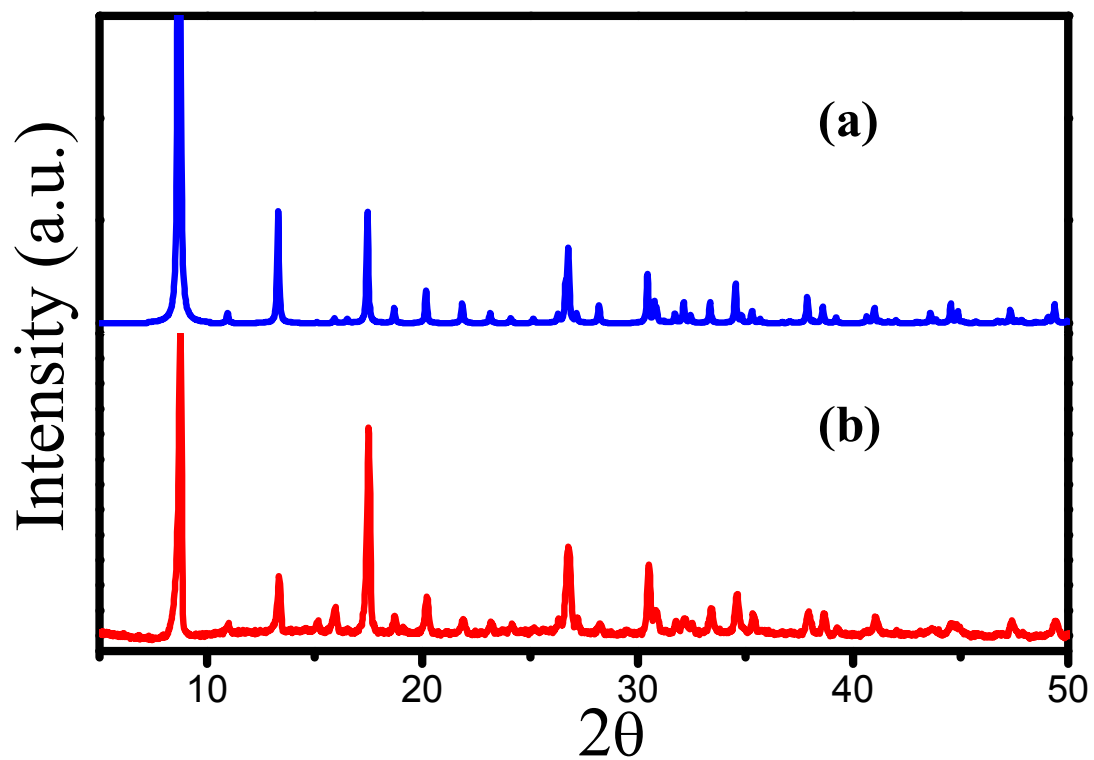

Figure 2S.

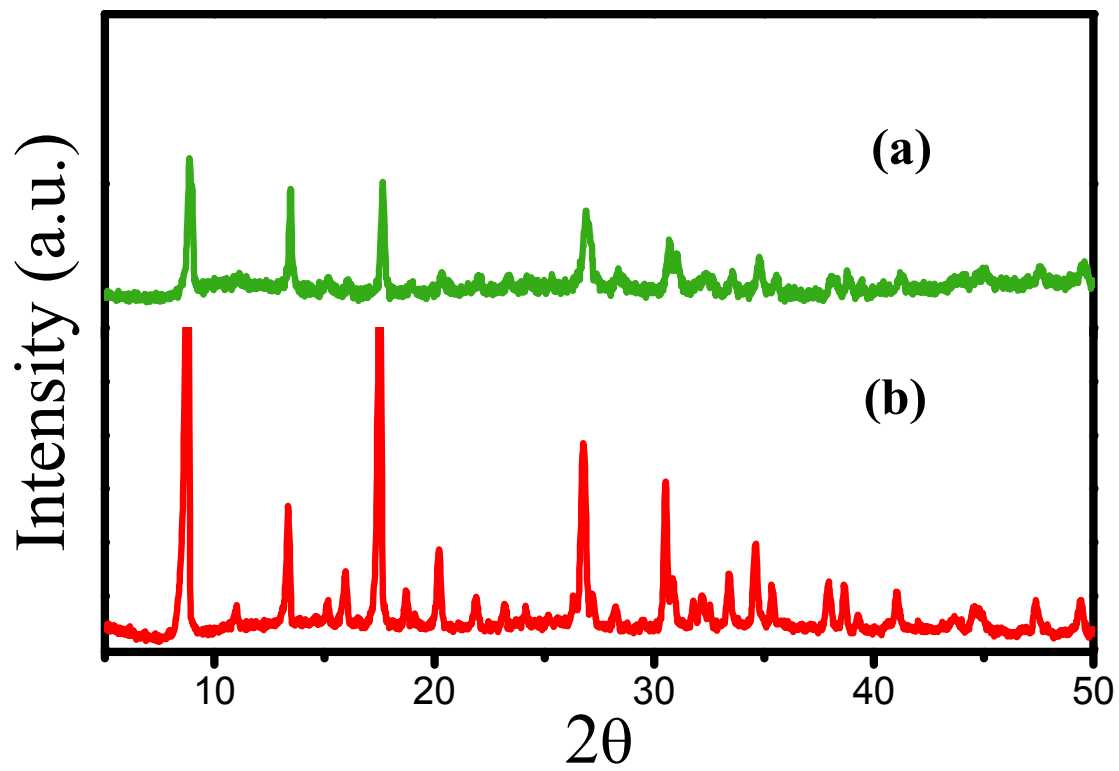

Figure 3S.

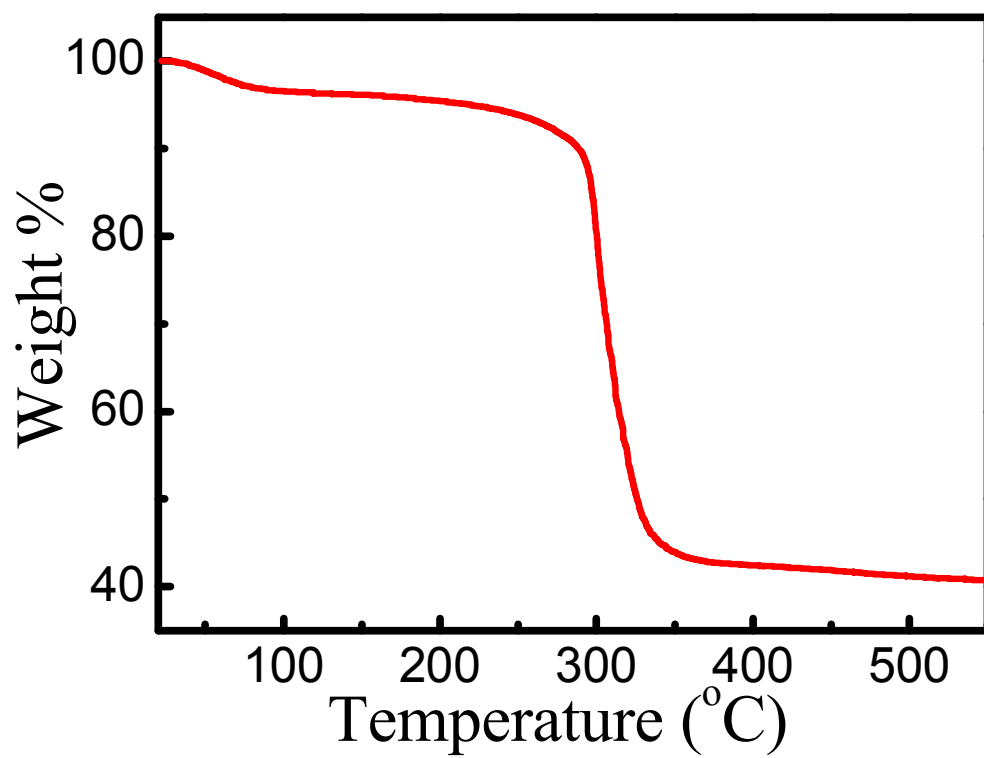

Figure 4S.

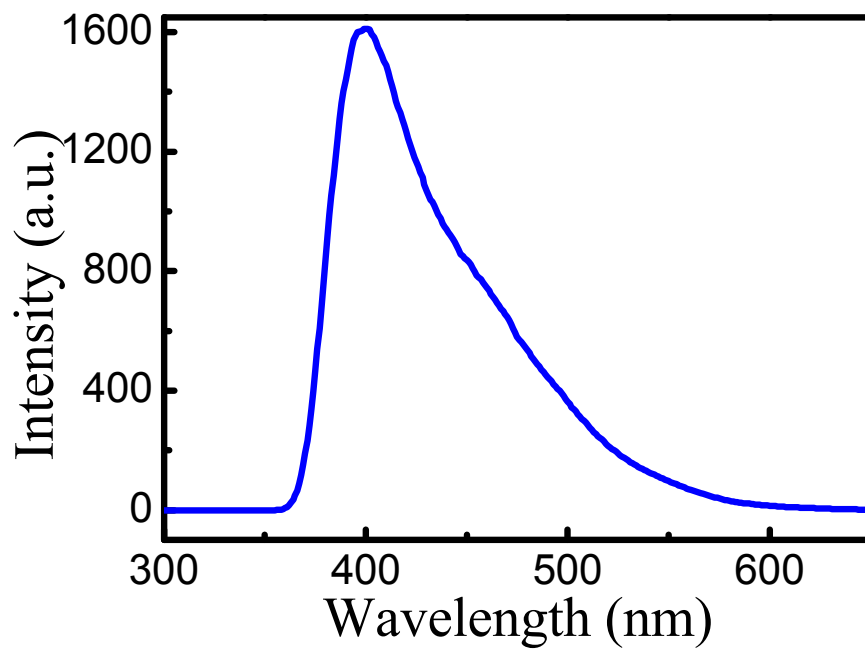

Figure 5S

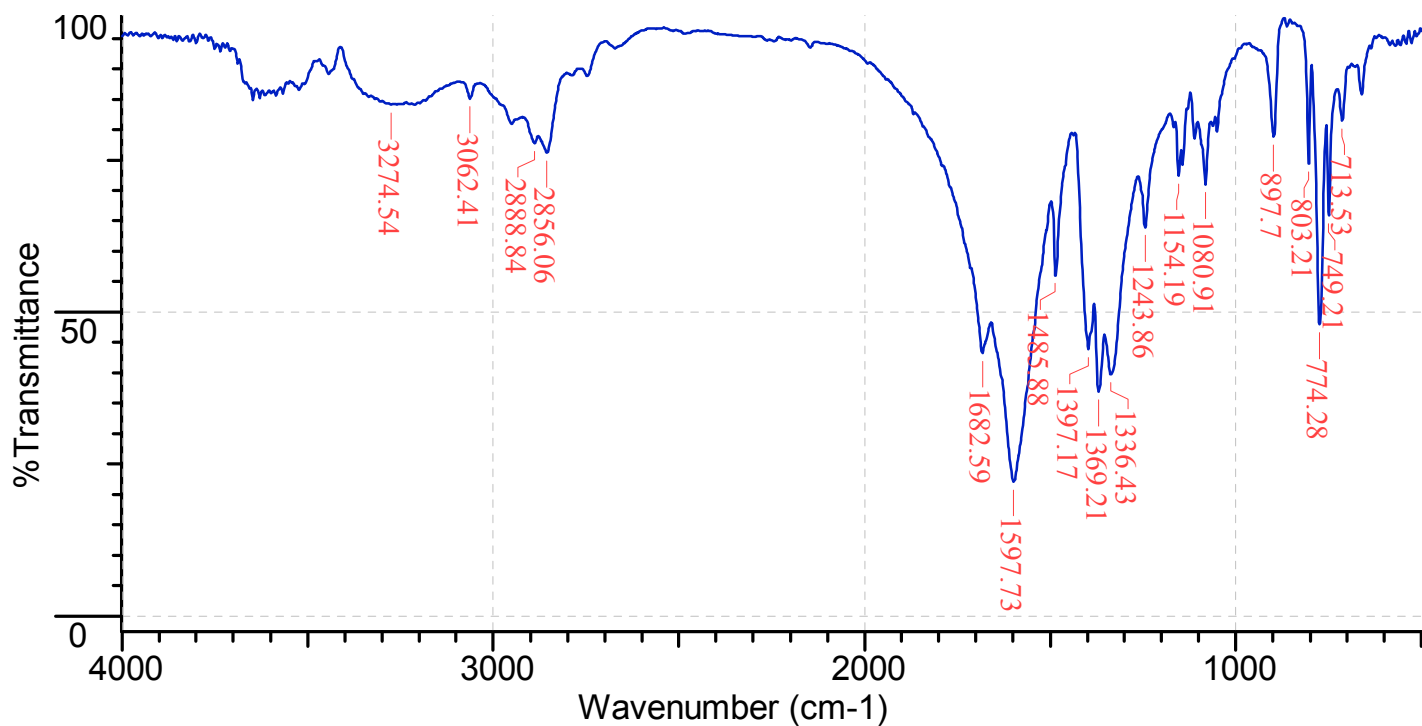

| No | cm-1    | %T     | Intensity | No | cm-1    | %T     | Intensity | No | cm-1    | %T     | Intensity |
|----|---------|--------|-----------|----|---------|--------|-----------|----|---------|--------|-----------|
| 1  | 713.53  | 81.536 | W         | 7  | 1154.19 | 72.462 | M         | 13 | 1597.73 | 22.086 | VS        |
| 2  | 749.21  | 65.858 | M         | 8  | 1243.86 | 63.981 | M         | 14 | 1682.59 | 43.288 | S         |
| 3  | 774.28  | 47.940 | S         | 9  | 1336.43 | 39.734 | S         | 15 | 2856.06 | 76.221 | W         |
| 4  | 803.21  | 74.421 | M         | 10 | 1369.21 | 36.899 | S         | 16 | 2888.84 | 77.829 | W         |
| 5  | 897.70  | 78.822 | W         | 11 | 1397.17 | 43.863 | S         | 17 | 3062.41 | 85.124 | W         |
| 6  | 1080.91 | 71.020 | M         | 12 | 1485.88 | 56.010 | M         | 18 | 3274.54 | 84.088 | W         |
